# Supplementary material for: Is tracheostomy a better choice than translaryngeal intubation for critically ill patients requiring mechanical ventilation for more than 14 days? A comparison of short-term outcomes
Source: Springer Nature journal article supplement (doi:10.1186/s12871-015-0159-9), 2015-12-01
Supplement: MOESM1 [file 9736560]

## Additional file 1

Table 1: Definition of primary ICU admission diagnosis and comorbidities in our cohort

| Category                             | Definition                                                                                                                           |
|--------------------------------------|--------------------------------------------------------------------------------------------------------------------------------------|
| Diagnosis of ICU admission           |                                                                                                                                      |
| Pneumonia                            | All pulmonary infections, and tuberculosis.                                                                                          |
| Sepsis                               | All septic conditions at ICU admission.                                                                                              |
| Cardiovascular or vascular disorders | Acute coronary syndromes, acute decompensated heart failure; cardiogenic shock, arrhythmias, and aortic dissection.                  |
| Trauma                               | —                                                                                                                                    |
| Brain disorder                       | Status epilepticus, intracranial hemorrhage, stroke, anoxic brain damage, encephalitis, meningitis, intracranial abscess, and tumor. |
| Burns                                | —                                                                                                                                    |
| Gastrointestinal disorders           | Gastrointestinal bleeding, perforation, obstruction, and adhesions.                                                                  |
| Comorbidities                        |                                                                                                                                      |
| Diabetes                             | —                                                                                                                                    |
| Chronic lung disease                 | Obstructive and restrictive lung diseases, old pulmonary tuberculosis, and bronchiectasis.                                           |
| Chronic heart disease                | Congestive heart failure, valvular heart disease, and coronary artery disease.                                                       |
| Chronic liver disease                | Hepatic cirrhosis and chronic hepatitis.                                                                                             |
| Chronic renal disease                | End-stage renal disease, nephrotic and nephritic syndrome, and other chronic renal insufficiencies.                                  |
| Malignancy                           | Hematological malignancy and solid tumor                                                                                             |
| Connective tissue disease            | Systemic lupus erythematosus, rheumatoid arthritis, dermatomyositis, and other connective tissue diseases.                           |
| Neuromuscular disease                | Myasthenia gravis, Parkinson's disease, amyotrophic lateral sclerosis, and other neuropathy or myopathy.                             |
